# Supplementary material
Source: PubMed Central journal article supplement (PMC4760677)
Supplement: la503949b_si_001.pdf [file la503949b_si_001.pdf]

**Multiscale approach to investigate self-assembly of telodendrimer  
based nanocarriers for anticancer drug-delivery**

Wenjuan Jiang,<sup>†</sup> Juntao Luo,<sup>‡</sup> and Shikha Nangia<sup>†\*</sup>

*<sup>‡</sup>Department of Pharmacology, Upstate Cancer Research Institute, State*

*University of New York, Syracuse, NY 13210*

*<sup>†</sup>Department of Biomedical and Chemical Engineering, Syracuse University,*

*Syracuse NY 13244*

\*To whom correspondence should be addressed.

Phone: 315-708-5712

Fax: 315-443-9175

Email: [snangia@syr.edu](mailto:snangia@syr.edu)

## Supporting Information:

Table S1. Bead types: GROMACS topology file for coarse grained PEG<sup>5K</sup>CA<sub>8</sub> telodendrimer.

| nr | type | resnr | residue | atom | cgnr | charge |
|----|------|-------|---------|------|------|--------|
| 1  | SN0  | 1     | PEG     | O1   | 1    | 0      |
| 2  | SN0  | 1     | PEG     | O1   | 2    | 0      |
| 3  | SN0  | 1     | PEG     | O1   | 3    | 0      |
| 4  | SN0  | 1     | PEG     | O1   | 4    | 0      |
| 5  | SN0  | 1     | PEG     | O1   | 5    | 0      |
| 6  | SN0  | 1     | PEG     | O1   | 6    | 0      |
| 7  | SN0  | 1     | PEG     | O1   | 7    | 0      |
| 8  | SN0  | 1     | PEG     | O1   | 8    | 0      |
| 9  | SN0  | 1     | PEG     | O1   | 9    | 0      |
| 10 | SN0  | 1     | PEG     | O1   | 10   | 0      |
| 11 | SN0  | 1     | PEG     | O1   | 11   | 0      |
| 12 | SN0  | 1     | PEG     | O1   | 12   | 0      |
| 13 | SN0  | 1     | PEG     | O1   | 13   | 0      |
| 14 | SN0  | 1     | PEG     | O1   | 14   | 0      |
| 15 | SN0  | 1     | PEG     | O1   | 15   | 0      |
| 16 | SN0  | 1     | PEG     | O1   | 16   | 0      |
| 17 | SN0  | 1     | PEG     | O1   | 17   | 0      |
| 18 | SN0  | 1     | PEG     | O1   | 18   | 0      |
| 19 | SN0  | 1     | PEG     | O1   | 19   | 0      |
| 20 | SN0  | 1     | PEG     | O1   | 20   | 0      |
| 21 | SN0  | 1     | PEG     | O1   | 21   | 0      |
| 22 | SN0  | 1     | PEG     | O1   | 22   | 0      |
| 23 | SN0  | 1     | PEG     | O1   | 23   | 0      |
| 24 | SN0  | 1     | PEG     | O1   | 24   | 0      |
| 25 | SN0  | 1     | PEG     | O1   | 25   | 0      |
| 26 | SN0  | 1     | PEG     | O1   | 26   | 0      |
| 27 | SN0  | 1     | PEG     | O1   | 27   | 0      |
| 28 | SN0  | 1     | PEG     | O1   | 28   | 0      |
| 29 | SN0  | 1     | PEG     | O1   | 29   | 0      |
| 30 | SN0  | 1     | PEG     | O1   | 30   | 0      |
| 31 | SN0  | 1     | PEG     | O1   | 31   | 0      |
| 32 | SN0  | 1     | PEG     | O1   | 32   | 0      |
| 33 | SN0  | 1     | PEG     | O1   | 33   | 0      |
| 34 | SN0  | 1     | PEG     | O1   | 34   | 0      |

|    |     |   |     |    |    |   |
|----|-----|---|-----|----|----|---|
| 35 | SN0 | 1 | PEG | O1 | 35 | 0 |
| 36 | SN0 | 1 | PEG | O1 | 36 | 0 |
| 37 | SN0 | 1 | PEG | O1 | 37 | 0 |
| 38 | SN0 | 1 | PEG | O1 | 38 | 0 |
| 39 | SN0 | 1 | PEG | O1 | 39 | 0 |
| 40 | SN0 | 1 | PEG | O1 | 40 | 0 |
| 41 | SN0 | 1 | PEG | O1 | 41 | 0 |
| 42 | SN0 | 1 | PEG | O1 | 42 | 0 |
| 43 | SN0 | 1 | PEG | O1 | 43 | 0 |
| 44 | SN0 | 1 | PEG | O1 | 44 | 0 |
| 45 | SN0 | 1 | PEG | O1 | 45 | 0 |
| 46 | SN0 | 1 | PEG | O1 | 46 | 0 |
| 47 | SN0 | 1 | PEG | O1 | 47 | 0 |
| 48 | SN0 | 1 | PEG | O1 | 48 | 0 |
| 49 | SN0 | 1 | PEG | O1 | 49 | 0 |
| 50 | SN0 | 1 | PEG | O1 | 50 | 0 |
| 51 | SN0 | 1 | PEG | O1 | 51 | 0 |
| 52 | SN0 | 1 | PEG | O1 | 52 | 0 |
| 53 | SN0 | 1 | PEG | O1 | 53 | 0 |
| 54 | SN0 | 1 | PEG | O1 | 54 | 0 |
| 55 | SN0 | 1 | PEG | O1 | 55 | 0 |
| 56 | SN0 | 1 | PEG | O1 | 56 | 0 |
| 57 | SN0 | 1 | PEG | O1 | 57 | 0 |
| 58 | SN0 | 1 | PEG | O1 | 58 | 0 |
| 59 | SN0 | 1 | PEG | O1 | 59 | 0 |
| 60 | SN0 | 1 | PEG | O1 | 60 | 0 |
| 61 | SN0 | 1 | PEG | O1 | 61 | 0 |
| 62 | SN0 | 1 | PEG | O1 | 62 | 0 |
| 63 | SN0 | 1 | PEG | O1 | 63 | 0 |
| 64 | SN0 | 1 | PEG | O1 | 64 | 0 |
| 65 | SN0 | 1 | PEG | O1 | 65 | 0 |
| 66 | SN0 | 1 | PEG | O1 | 66 | 0 |
| 67 | SN0 | 1 | PEG | O1 | 67 | 0 |
| 68 | SN0 | 1 | PEG | O1 | 68 | 0 |
| 69 | SN0 | 1 | PEG | O1 | 69 | 0 |
| 70 | SN0 | 1 | PEG | O1 | 70 | 0 |
| 71 | SN0 | 1 | PEG | O1 | 71 | 0 |
| 72 | SN0 | 1 | PEG | O1 | 72 | 0 |
| 73 | SN0 | 1 | PEG | O1 | 73 | 0 |
| 74 | SN0 | 1 | PEG | O1 | 74 | 0 |
| 75 | SN0 | 1 | PEG | O1 | 75 | 0 |
| 76 | SN0 | 1 | PEG | O1 | 76 | 0 |

|     |     |   |     |     |     |   |
|-----|-----|---|-----|-----|-----|---|
| 77  | SN0 | 1 | PEG | O1  | 77  | 0 |
| 78  | SN0 | 1 | PEG | O1  | 78  | 0 |
| 79  | SN0 | 1 | PEG | O1  | 79  | 0 |
| 80  | SN0 | 1 | PEG | O1  | 80  | 0 |
| 81  | SN0 | 1 | PEG | O1  | 81  | 0 |
| 82  | SN0 | 1 | PEG | O1  | 82  | 0 |
| 83  | SN0 | 1 | PEG | O1  | 83  | 0 |
| 84  | SN0 | 1 | PEG | O1  | 84  | 0 |
| 85  | SN0 | 1 | PEG | O1  | 85  | 0 |
| 86  | SN0 | 1 | PEG | O1  | 86  | 0 |
| 87  | SN0 | 1 | PEG | O1  | 87  | 0 |
| 88  | SN0 | 1 | PEG | O1  | 88  | 0 |
| 89  | SN0 | 1 | PEG | O1  | 89  | 0 |
| 90  | SN0 | 1 | PEG | O1  | 90  | 0 |
| 91  | SN0 | 1 | PEG | O1  | 91  | 0 |
| 92  | SN0 | 1 | PEG | O1  | 92  | 0 |
| 93  | SN0 | 1 | PEG | O1  | 93  | 0 |
| 94  | SN0 | 1 | PEG | O1  | 94  | 0 |
| 95  | SN0 | 1 | PEG | O1  | 95  | 0 |
| 96  | SN0 | 1 | PEG | O1  | 96  | 0 |
| 97  | SN0 | 1 | PEG | O1  | 97  | 0 |
| 98  | SN0 | 1 | PEG | O1  | 98  | 0 |
| 99  | SN0 | 1 | PEG | O1  | 99  | 0 |
| 100 | SN0 | 1 | PEG | O1  | 100 | 0 |
| 101 | SN0 | 1 | PEG | O1  | 101 | 0 |
| 102 | SN0 | 1 | PEG | O1  | 102 | 0 |
| 103 | SN0 | 1 | PEG | O1  | 103 | 0 |
| 104 | SN0 | 1 | PEG | O1  | 104 | 0 |
| 105 | SN0 | 1 | PEG | O1  | 105 | 0 |
| 106 | SN0 | 1 | PEG | O1  | 106 | 0 |
| 107 | SN0 | 1 | PEG | O1  | 107 | 0 |
| 108 | SN0 | 1 | PEG | O1  | 108 | 0 |
| 109 | SN0 | 1 | PEG | O1  | 109 | 0 |
| 110 | SN0 | 1 | PEG | O1  | 110 | 0 |
| 111 | SN0 | 1 | PEG | O1  | 111 | 0 |
| 112 | SN0 | 1 | PEG | O1  | 112 | 0 |
| 113 | P5  | 2 | LYS | BB  | 113 | 0 |
| 114 | C3  | 2 | LYS | SC1 | 114 | 0 |
| 115 | P1  | 2 | LYS | SC2 | 115 | 0 |
| 116 | P5  | 3 | LYS | BB  | 116 | 0 |
| 117 | C3  | 3 | LYS | SC1 | 117 | 0 |
| 118 | P1  | 3 | LYS | SC2 | 118 | 0 |

|     |     |    |      |     |     |   |
|-----|-----|----|------|-----|-----|---|
| 119 | P5  | 4  | LYS  | BB  | 119 | 0 |
| 120 | C3  | 4  | LYS  | SC1 | 120 | 0 |
| 121 | P1  | 4  | LYS  | SC2 | 121 | 0 |
| 122 | P5  | 5  | LYS  | BB  | 122 | 0 |
| 123 | C3  | 5  | LYS  | SC1 | 123 | 0 |
| 124 | P1  | 5  | LYS  | SC2 | 124 | 0 |
| 125 | P5  | 6  | LYS  | BB  | 125 | 0 |
| 126 | C3  | 6  | LYS  | SC1 | 126 | 0 |
| 127 | P1  | 6  | LYS  | SC2 | 127 | 0 |
| 128 | P5  | 7  | LYS  | BB  | 128 | 0 |
| 129 | C3  | 7  | LYS  | SC1 | 129 | 0 |
| 130 | P1  | 7  | LYS  | SC2 | 130 | 0 |
| 131 | P5  | 8  | LYS  | BB  | 131 | 0 |
| 132 | C3  | 8  | LYS  | SC1 | 132 | 0 |
| 133 | P1  | 8  | LYS  | SC2 | 133 | 0 |
| 134 | SP5 | 9  | CHOA | OH  | 134 | 0 |
| 135 | SC1 | 9  | CHOA | R1  | 135 | 0 |
| 136 | SC3 | 9  | CHOA | R2  | 136 | 0 |
| 137 | SP5 | 9  | CHOA | O2  | 137 | 0 |
| 138 | SP5 | 9  | CHOA | O3  | 138 | 0 |
| 139 | SC1 | 9  | CHOA | R3  | 139 | 0 |
| 140 | SC1 | 9  | CHOA | C1  | 140 | 0 |
| 141 | SP5 | 10 | CHOA | OH  | 141 | 0 |
| 142 | SC1 | 10 | CHOA | R1  | 142 | 0 |
| 143 | SC3 | 10 | CHOA | R2  | 143 | 0 |
| 144 | SP5 | 10 | CHOA | O2  | 144 | 0 |
| 145 | SP5 | 10 | CHOA | O3  | 145 | 0 |
| 146 | SC1 | 10 | CHOA | R3  | 146 | 0 |
| 147 | SC1 | 10 | CHOA | C1  | 147 | 0 |
| 148 | SP5 | 11 | CHOA | OH  | 148 | 0 |
| 149 | SC1 | 11 | CHOA | R1  | 149 | 0 |
| 150 | SC3 | 11 | CHOA | R2  | 150 | 0 |
| 151 | SP5 | 11 | CHOA | O2  | 151 | 0 |
| 152 | SP5 | 11 | CHOA | O3  | 152 | 0 |
| 153 | SC1 | 11 | CHOA | R3  | 153 | 0 |
| 154 | SC1 | 11 | CHOA | C1  | 154 | 0 |
| 155 | SP5 | 12 | CHOA | OH  | 155 | 0 |
| 156 | SC1 | 12 | CHOA | R1  | 156 | 0 |
| 157 | SC3 | 12 | CHOA | R2  | 157 | 0 |
| 158 | SP5 | 12 | CHOA | O2  | 158 | 0 |
| 159 | SP5 | 12 | CHOA | O3  | 159 | 0 |
| 160 | SC1 | 12 | CHOA | R3  | 160 | 0 |

|     |     |    |      |    |     |   |
|-----|-----|----|------|----|-----|---|
| 161 | SC1 | 12 | CHOA | C1 | 161 | 0 |
| 162 | SP5 | 13 | CHOA | OH | 162 | 0 |
| 163 | SC1 | 13 | CHOA | R1 | 163 | 0 |
| 164 | SC3 | 13 | CHOA | R2 | 164 | 0 |
| 165 | SP5 | 13 | CHOA | O2 | 165 | 0 |
| 166 | SP5 | 13 | CHOA | O3 | 166 | 0 |
| 167 | SC1 | 13 | CHOA | R3 | 167 | 0 |
| 168 | SC1 | 13 | CHOA | C1 | 168 | 0 |
| 169 | SP5 | 14 | CHOA | OH | 169 | 0 |
| 170 | SC1 | 14 | CHOA | R1 | 170 | 0 |
| 171 | SC3 | 14 | CHOA | R2 | 171 | 0 |
| 172 | SP5 | 14 | CHOA | O2 | 172 | 0 |
| 173 | SP5 | 14 | CHOA | O3 | 173 | 0 |
| 174 | SC1 | 14 | CHOA | R3 | 174 | 0 |
| 175 | SC1 | 14 | CHOA | C1 | 175 | 0 |
| 176 | SP5 | 15 | CHOA | OH | 176 | 0 |
| 177 | SC1 | 15 | CHOA | R1 | 177 | 0 |
| 178 | SC3 | 15 | CHOA | R2 | 178 | 0 |
| 179 | SP5 | 15 | CHOA | O2 | 179 | 0 |
| 180 | SP5 | 15 | CHOA | O3 | 180 | 0 |
| 181 | SC1 | 15 | CHOA | R3 | 181 | 0 |
| 182 | SC1 | 15 | CHOA | C1 | 182 | 0 |
| 183 | SP5 | 16 | CHOA | OH | 183 | 0 |
| 184 | SC1 | 16 | CHOA | R1 | 184 | 0 |
| 185 | SC3 | 16 | CHOA | R2 | 185 | 0 |
| 186 | SP5 | 16 | CHOA | O2 | 186 | 0 |
| 187 | SP5 | 16 | CHOA | O3 | 187 | 0 |
| 188 | SC1 | 16 | CHOA | R3 | 188 | 0 |
| 189 | SC1 | 16 | CHOA | C1 | 189 | 0 |

---

Note: The MARTINI bead type for cholic acid beads were changed to SC1 for hydrophobic and SP5 for hydrophilic.

Table S2. Bond lengths: GROMACS topology file for coarse grained PEG<sup>5K</sup>CA<sub>8</sub> telodendrimer.

| i  | j  | funct | length | force |
|----|----|-------|--------|-------|
| 1  | 2  | 1     | 0.33   | 17000 |
| 2  | 3  | 1     | 0.33   | 17000 |
| 3  | 4  | 1     | 0.33   | 17000 |
| 4  | 5  | 1     | 0.33   | 17000 |
| 5  | 6  | 1     | 0.33   | 17000 |
| 6  | 7  | 1     | 0.33   | 17000 |
| 7  | 8  | 1     | 0.33   | 17000 |
| 8  | 9  | 1     | 0.33   | 17000 |
| 9  | 10 | 1     | 0.33   | 17000 |
| 10 | 11 | 1     | 0.33   | 17000 |
| 11 | 12 | 1     | 0.33   | 17000 |
| 12 | 13 | 1     | 0.33   | 17000 |
| 13 | 14 | 1     | 0.33   | 17000 |
| 14 | 15 | 1     | 0.33   | 17000 |
| 15 | 16 | 1     | 0.33   | 17000 |
| 16 | 17 | 1     | 0.33   | 17000 |
| 17 | 18 | 1     | 0.33   | 17000 |
| 18 | 19 | 1     | 0.33   | 17000 |
| 19 | 20 | 1     | 0.33   | 17000 |
| 20 | 21 | 1     | 0.33   | 17000 |
| 21 | 22 | 1     | 0.33   | 17000 |
| 22 | 23 | 1     | 0.33   | 17000 |
| 23 | 24 | 1     | 0.33   | 17000 |
| 24 | 25 | 1     | 0.33   | 17000 |
| 25 | 26 | 1     | 0.33   | 17000 |
| 26 | 27 | 1     | 0.33   | 17000 |
| 27 | 28 | 1     | 0.33   | 17000 |
| 28 | 29 | 1     | 0.33   | 17000 |
| 29 | 30 | 1     | 0.33   | 17000 |
| 30 | 31 | 1     | 0.33   | 17000 |
| 31 | 32 | 1     | 0.33   | 17000 |
| 32 | 33 | 1     | 0.33   | 17000 |
| 33 | 34 | 1     | 0.33   | 17000 |
| 34 | 35 | 1     | 0.33   | 17000 |
| 35 | 36 | 1     | 0.33   | 17000 |
| 36 | 37 | 1     | 0.33   | 17000 |
| 37 | 38 | 1     | 0.33   | 17000 |
| 38 | 39 | 1     | 0.33   | 17000 |

|    |    |   |      |       |
|----|----|---|------|-------|
| 39 | 40 | 1 | 0.33 | 17000 |
| 40 | 41 | 1 | 0.33 | 17000 |
| 41 | 42 | 1 | 0.33 | 17000 |
| 42 | 43 | 1 | 0.33 | 17000 |
| 43 | 44 | 1 | 0.33 | 17000 |
| 44 | 45 | 1 | 0.33 | 17000 |
| 45 | 46 | 1 | 0.33 | 17000 |
| 46 | 47 | 1 | 0.33 | 17000 |
| 47 | 48 | 1 | 0.33 | 17000 |
| 48 | 49 | 1 | 0.33 | 17000 |
| 49 | 50 | 1 | 0.33 | 17000 |
| 50 | 51 | 1 | 0.33 | 17000 |
| 51 | 52 | 1 | 0.33 | 17000 |
| 52 | 53 | 1 | 0.33 | 17000 |
| 53 | 54 | 1 | 0.33 | 17000 |
| 54 | 55 | 1 | 0.33 | 17000 |
| 55 | 56 | 1 | 0.33 | 17000 |
| 56 | 57 | 1 | 0.33 | 17000 |
| 57 | 58 | 1 | 0.33 | 17000 |
| 58 | 59 | 1 | 0.33 | 17000 |
| 59 | 60 | 1 | 0.33 | 17000 |
| 60 | 61 | 1 | 0.33 | 17000 |
| 61 | 62 | 1 | 0.33 | 17000 |
| 62 | 63 | 1 | 0.33 | 17000 |
| 63 | 64 | 1 | 0.33 | 17000 |
| 64 | 65 | 1 | 0.33 | 17000 |
| 65 | 66 | 1 | 0.33 | 17000 |
| 66 | 67 | 1 | 0.33 | 17000 |
| 67 | 68 | 1 | 0.33 | 17000 |
| 68 | 69 | 1 | 0.33 | 17000 |
| 69 | 70 | 1 | 0.33 | 17000 |
| 70 | 71 | 1 | 0.33 | 17000 |
| 71 | 72 | 1 | 0.33 | 17000 |
| 72 | 73 | 1 | 0.33 | 17000 |
| 73 | 74 | 1 | 0.33 | 17000 |
| 74 | 75 | 1 | 0.33 | 17000 |
| 75 | 76 | 1 | 0.33 | 17000 |
| 76 | 77 | 1 | 0.33 | 17000 |
| 77 | 78 | 1 | 0.33 | 17000 |
| 78 | 79 | 1 | 0.33 | 17000 |
| 79 | 80 | 1 | 0.33 | 17000 |
| 80 | 81 | 1 | 0.33 | 17000 |



|     |     |   |      |       |
|-----|-----|---|------|-------|
| 81  | 82  | 1 | 0.33 | 17000 |
| 82  | 83  | 1 | 0.33 | 17000 |
| 83  | 84  | 1 | 0.33 | 17000 |
| 84  | 85  | 1 | 0.33 | 17000 |
| 85  | 86  | 1 | 0.33 | 17000 |
| 86  | 87  | 1 | 0.33 | 17000 |
| 87  | 88  | 1 | 0.33 | 17000 |
| 88  | 89  | 1 | 0.33 | 17000 |
| 89  | 90  | 1 | 0.33 | 17000 |
| 90  | 91  | 1 | 0.33 | 17000 |
| 91  | 92  | 1 | 0.33 | 17000 |
| 92  | 93  | 1 | 0.33 | 17000 |
| 93  | 94  | 1 | 0.33 | 17000 |
| 94  | 95  | 1 | 0.33 | 17000 |
| 95  | 96  | 1 | 0.33 | 17000 |
| 96  | 97  | 1 | 0.33 | 17000 |
| 97  | 98  | 1 | 0.33 | 17000 |
| 98  | 99  | 1 | 0.33 | 17000 |
| 99  | 100 | 1 | 0.33 | 17000 |
| 100 | 101 | 1 | 0.33 | 17000 |
| 101 | 102 | 1 | 0.33 | 17000 |
| 102 | 103 | 1 | 0.33 | 17000 |
| 103 | 104 | 1 | 0.33 | 17000 |
| 104 | 105 | 1 | 0.33 | 17000 |
| 105 | 106 | 1 | 0.33 | 17000 |
| 106 | 107 | 1 | 0.33 | 17000 |
| 107 | 108 | 1 | 0.33 | 17000 |
| 108 | 109 | 1 | 0.33 | 17000 |
| 109 | 110 | 1 | 0.33 | 17000 |
| 110 | 111 | 1 | 0.33 | 17000 |
| 111 | 112 | 1 | 0.33 | 17000 |
| 112 | 119 | 1 | 0.33 | 1200  |
| 113 | 116 | 1 | 0.35 | 1250  |
| 116 | 119 | 1 | 0.35 | 1250  |
| 125 | 128 | 1 | 0.35 | 1250  |
| 118 | 122 | 1 | 0.35 | 1250  |
| 121 | 128 | 1 | 0.35 | 1250  |
| 130 | 131 | 1 | 0.35 | 1250  |
| 113 | 114 | 1 | 0.33 | 5000  |
| 116 | 117 | 1 | 0.33 | 5000  |
| 119 | 120 | 1 | 0.33 | 5000  |
| 122 | 123 | 1 | 0.33 | 5000  |

|     |     |   |       |       |
|-----|-----|---|-------|-------|
| 125 | 126 | 1 | 0.33  | 5000  |
| 128 | 129 | 1 | 0.33  | 5000  |
| 131 | 132 | 1 | 0.33  | 5000  |
| 114 | 115 | 1 | 0.28  | 5000  |
| 117 | 118 | 1 | 0.28  | 5000  |
| 120 | 121 | 1 | 0.28  | 5000  |
| 123 | 124 | 1 | 0.28  | 5000  |
| 126 | 127 | 1 | 0.28  | 5000  |
| 129 | 130 | 1 | 0.28  | 5000  |
| 132 | 133 | 1 | 0.28  | 5000  |
| 115 | 140 | 1 | 0.368 | 20000 |
| 113 | 147 | 1 | 0.368 | 20000 |
| 125 | 154 | 1 | 0.368 | 20000 |
| 127 | 161 | 1 | 0.368 | 20000 |
| 122 | 168 | 1 | 0.368 | 20000 |
| 124 | 175 | 1 | 0.368 | 20000 |
| 131 | 182 | 1 | 0.368 | 20000 |
| 133 | 189 | 1 | 0.368 | 20000 |
| 134 | 135 | 1 | 0.242 | 20000 |
| 135 | 136 | 1 | 0.26  | 20000 |
| 135 | 137 | 1 | 0.341 | 20000 |
| 137 | 139 | 1 | 0.213 | 20000 |
| 137 | 140 | 1 | 0.544 | 20000 |
| 138 | 139 | 1 | 0.203 | 20000 |
| 139 | 140 | 1 | 0.368 | 20000 |
| 141 | 142 | 1 | 0.242 | 20000 |
| 142 | 143 | 1 | 0.26  | 20000 |
| 142 | 144 | 1 | 0.341 | 20000 |
| 144 | 146 | 1 | 0.213 | 20000 |
| 144 | 147 | 1 | 0.544 | 20000 |
| 145 | 146 | 1 | 0.203 | 20000 |
| 146 | 147 | 1 | 0.368 | 20000 |
| 148 | 149 | 1 | 0.242 | 20000 |
| 149 | 150 | 1 | 0.26  | 20000 |
| 149 | 151 | 1 | 0.341 | 20000 |
| 151 | 153 | 1 | 0.213 | 20000 |
| 151 | 154 | 1 | 0.544 | 20000 |
| 152 | 153 | 1 | 0.203 | 20000 |
| 153 | 154 | 1 | 0.368 | 20000 |
| 155 | 156 | 1 | 0.242 | 20000 |
| 156 | 157 | 1 | 0.26  | 20000 |
| 156 | 158 | 1 | 0.341 | 20000 |

|     |     |   |       |       |
|-----|-----|---|-------|-------|
| 158 | 160 | 1 | 0.213 | 20000 |
| 158 | 161 | 1 | 0.544 | 20000 |
| 159 | 160 | 1 | 0.203 | 20000 |
| 160 | 161 | 1 | 0.368 | 20000 |
| 162 | 163 | 1 | 0.242 | 20000 |
| 163 | 164 | 1 | 0.26  | 20000 |
| 163 | 165 | 1 | 0.341 | 20000 |
| 165 | 167 | 1 | 0.213 | 20000 |
| 165 | 168 | 1 | 0.544 | 20000 |
| 166 | 167 | 1 | 0.203 | 20000 |
| 167 | 168 | 1 | 0.368 | 20000 |
| 169 | 170 | 1 | 0.242 | 20000 |
| 170 | 171 | 1 | 0.26  | 20000 |
| 170 | 172 | 1 | 0.341 | 20000 |
| 172 | 174 | 1 | 0.213 | 20000 |
| 172 | 175 | 1 | 0.544 | 20000 |
| 173 | 174 | 1 | 0.203 | 20000 |
| 174 | 175 | 1 | 0.368 | 20000 |
| 176 | 177 | 1 | 0.242 | 20000 |
| 177 | 178 | 1 | 0.26  | 20000 |
| 177 | 179 | 1 | 0.341 | 20000 |
| 179 | 181 | 1 | 0.213 | 20000 |
| 179 | 182 | 1 | 0.544 | 20000 |
| 180 | 181 | 1 | 0.203 | 20000 |
| 181 | 182 | 1 | 0.368 | 20000 |
| 183 | 184 | 1 | 0.242 | 20000 |
| 184 | 185 | 1 | 0.26  | 20000 |
| 184 | 186 | 1 | 0.341 | 20000 |
| 186 | 188 | 1 | 0.213 | 20000 |
| 186 | 189 | 1 | 0.544 | 20000 |
| 187 | 188 | 1 | 0.203 | 20000 |
| 188 | 189 | 1 | 0.368 | 20000 |

---

Table S3. Constraints: GROMACS topology file for coarse grained PEG<sup>5K</sup>CA<sub>8</sub> telodendrimer.

| i   | j   | funct | length |
|-----|-----|-------|--------|
| 134 | 136 | 1     | 0.493  |
| 134 | 137 | 1     | 0.604  |
| 136 | 137 | 1     | 0.272  |
| 136 | 138 | 1     | 0.346  |
| 137 | 138 | 1     | 0.294  |
| 138 | 140 | 1     | 0.406  |
| 141 | 143 | 1     | 0.493  |
| 141 | 144 | 1     | 0.604  |
| 143 | 144 | 1     | 0.272  |
| 143 | 145 | 1     | 0.346  |
| 144 | 145 | 1     | 0.294  |
| 145 | 147 | 1     | 0.406  |
| 148 | 150 | 1     | 0.493  |
| 148 | 151 | 1     | 0.604  |
| 150 | 151 | 1     | 0.272  |
| 150 | 152 | 1     | 0.346  |
| 151 | 152 | 1     | 0.294  |
| 152 | 154 | 1     | 0.406  |
| 155 | 157 | 1     | 0.493  |
| 155 | 158 | 1     | 0.604  |
| 157 | 158 | 1     | 0.272  |
| 157 | 159 | 1     | 0.346  |
| 158 | 159 | 1     | 0.294  |
| 159 | 161 | 1     | 0.406  |
| 162 | 164 | 1     | 0.493  |
| 162 | 165 | 1     | 0.604  |
| 164 | 165 | 1     | 0.272  |
| 164 | 166 | 1     | 0.346  |
| 165 | 166 | 1     | 0.294  |
| 166 | 168 | 1     | 0.406  |
| 169 | 171 | 1     | 0.493  |
| 169 | 172 | 1     | 0.604  |
| 171 | 172 | 1     | 0.272  |
| 171 | 173 | 1     | 0.346  |
| 172 | 173 | 1     | 0.294  |
| 173 | 175 | 1     | 0.406  |
| 176 | 178 | 1     | 0.493  |
| 176 | 179 | 1     | 0.604  |

|     |     |   |       |
|-----|-----|---|-------|
| 178 | 179 | 1 | 0.272 |
| 178 | 180 | 1 | 0.346 |
| 179 | 180 | 1 | 0.294 |
| 180 | 182 | 1 | 0.406 |
| 183 | 185 | 1 | 0.493 |
| 183 | 186 | 1 | 0.604 |
| 185 | 186 | 1 | 0.272 |
| 185 | 187 | 1 | 0.346 |
| 186 | 187 | 1 | 0.294 |
| 187 | 189 | 1 | 0.406 |

Table S4. Angles: GROMACS topology file for coarse grained PEG<sup>5K</sup>CA<sub>8</sub> telodendrimer.

| i  | j  | k  | funct | angle | force |
|----|----|----|-------|-------|-------|
| 1  | 2  | 3  | 2     | 130   | 50    |
| 2  | 3  | 4  | 2     | 130   | 50    |
| 3  | 4  | 5  | 2     | 130   | 50    |
| 4  | 5  | 6  | 2     | 130   | 50    |
| 5  | 6  | 7  | 2     | 130   | 50    |
| 6  | 7  | 8  | 2     | 130   | 50    |
| 7  | 8  | 9  | 2     | 130   | 50    |
| 8  | 9  | 10 | 2     | 130   | 50    |
| 9  | 10 | 11 | 2     | 130   | 50    |
| 10 | 11 | 12 | 2     | 130   | 50    |
| 11 | 12 | 13 | 2     | 130   | 50    |
| 12 | 13 | 14 | 2     | 130   | 50    |
| 13 | 14 | 15 | 2     | 130   | 50    |
| 14 | 15 | 16 | 2     | 130   | 50    |
| 15 | 16 | 17 | 2     | 130   | 50    |
| 16 | 17 | 18 | 2     | 130   | 50    |
| 17 | 18 | 19 | 2     | 130   | 50    |
| 18 | 19 | 20 | 2     | 130   | 50    |
| 19 | 20 | 21 | 2     | 130   | 50    |
| 20 | 21 | 22 | 2     | 130   | 50    |
| 21 | 22 | 23 | 2     | 130   | 50    |
| 22 | 23 | 24 | 2     | 130   | 50    |
| 23 | 24 | 25 | 2     | 130   | 50    |
| 24 | 25 | 26 | 2     | 130   | 50    |

|    |    |    |   |     |    |
|----|----|----|---|-----|----|
| 25 | 26 | 27 | 2 | 130 | 50 |
| 26 | 27 | 28 | 2 | 130 | 50 |
| 27 | 28 | 29 | 2 | 130 | 50 |
| 28 | 29 | 30 | 2 | 130 | 50 |
| 29 | 30 | 31 | 2 | 130 | 50 |
| 30 | 31 | 32 | 2 | 130 | 50 |
| 31 | 32 | 33 | 2 | 130 | 50 |
| 32 | 33 | 34 | 2 | 130 | 50 |
| 33 | 34 | 35 | 2 | 130 | 50 |
| 34 | 35 | 36 | 2 | 130 | 50 |
| 35 | 36 | 37 | 2 | 130 | 50 |
| 36 | 37 | 38 | 2 | 130 | 50 |
| 37 | 38 | 39 | 2 | 130 | 50 |
| 38 | 39 | 40 | 2 | 130 | 50 |
| 39 | 40 | 41 | 2 | 130 | 50 |
| 40 | 41 | 42 | 2 | 130 | 50 |
| 41 | 42 | 43 | 2 | 130 | 50 |
| 42 | 43 | 44 | 2 | 130 | 50 |
| 43 | 44 | 45 | 2 | 130 | 50 |
| 44 | 45 | 46 | 2 | 130 | 50 |
| 45 | 46 | 47 | 2 | 130 | 50 |
| 46 | 47 | 48 | 2 | 130 | 50 |
| 47 | 48 | 49 | 2 | 130 | 50 |
| 48 | 49 | 50 | 2 | 130 | 50 |
| 49 | 50 | 51 | 2 | 130 | 50 |
| 50 | 51 | 52 | 2 | 130 | 50 |
| 51 | 52 | 53 | 2 | 130 | 50 |
| 52 | 53 | 54 | 2 | 130 | 50 |
| 53 | 54 | 55 | 2 | 130 | 50 |
| 54 | 55 | 56 | 2 | 130 | 50 |
| 55 | 56 | 57 | 2 | 130 | 50 |
| 56 | 57 | 58 | 2 | 130 | 50 |
| 57 | 58 | 59 | 2 | 130 | 50 |
| 58 | 59 | 60 | 2 | 130 | 50 |
| 59 | 60 | 61 | 2 | 130 | 50 |
| 60 | 61 | 62 | 2 | 130 | 50 |
| 61 | 62 | 63 | 2 | 130 | 50 |
| 62 | 63 | 64 | 2 | 130 | 50 |
| 63 | 64 | 65 | 2 | 130 | 50 |
| 64 | 65 | 66 | 2 | 130 | 50 |
| 65 | 66 | 67 | 2 | 130 | 50 |
| 66 | 67 | 68 | 2 | 130 | 50 |

|     |     |     |   |     |    |
|-----|-----|-----|---|-----|----|
| 67  | 68  | 69  | 2 | 130 | 50 |
| 68  | 69  | 70  | 2 | 130 | 50 |
| 69  | 70  | 71  | 2 | 130 | 50 |
| 70  | 71  | 72  | 2 | 130 | 50 |
| 71  | 72  | 73  | 2 | 130 | 50 |
| 72  | 73  | 74  | 2 | 130 | 50 |
| 73  | 74  | 75  | 2 | 130 | 50 |
| 74  | 75  | 76  | 2 | 130 | 50 |
| 75  | 76  | 77  | 2 | 130 | 50 |
| 76  | 77  | 78  | 2 | 130 | 50 |
| 77  | 78  | 79  | 2 | 130 | 50 |
| 78  | 79  | 80  | 2 | 130 | 50 |
| 79  | 80  | 81  | 2 | 130 | 50 |
| 80  | 81  | 82  | 2 | 130 | 50 |
| 81  | 82  | 83  | 2 | 130 | 50 |
| 82  | 83  | 84  | 2 | 130 | 50 |
| 83  | 84  | 85  | 2 | 130 | 50 |
| 84  | 85  | 86  | 2 | 130 | 50 |
| 85  | 86  | 87  | 2 | 130 | 50 |
| 86  | 87  | 88  | 2 | 130 | 50 |
| 87  | 88  | 89  | 2 | 130 | 50 |
| 88  | 89  | 90  | 2 | 130 | 50 |
| 89  | 90  | 91  | 2 | 130 | 50 |
| 90  | 91  | 92  | 2 | 130 | 50 |
| 91  | 92  | 93  | 2 | 130 | 50 |
| 92  | 93  | 94  | 2 | 130 | 50 |
| 93  | 94  | 95  | 2 | 130 | 50 |
| 94  | 95  | 96  | 2 | 130 | 50 |
| 95  | 96  | 97  | 2 | 130 | 50 |
| 96  | 97  | 98  | 2 | 130 | 50 |
| 97  | 98  | 99  | 2 | 130 | 50 |
| 98  | 99  | 100 | 2 | 130 | 50 |
| 99  | 100 | 101 | 2 | 130 | 50 |
| 100 | 101 | 102 | 2 | 130 | 50 |
| 101 | 102 | 103 | 2 | 130 | 50 |
| 102 | 103 | 104 | 2 | 130 | 50 |
| 103 | 104 | 105 | 2 | 130 | 50 |
| 104 | 105 | 106 | 2 | 130 | 50 |
| 105 | 106 | 107 | 2 | 130 | 50 |
| 106 | 107 | 108 | 2 | 130 | 50 |
| 107 | 108 | 109 | 2 | 130 | 50 |
| 108 | 109 | 110 | 2 | 130 | 50 |

|     |     |     |   |     |    |
|-----|-----|-----|---|-----|----|
| 109 | 110 | 111 | 2 | 130 | 50 |
| 110 | 111 | 112 | 2 | 130 | 50 |
| 111 | 112 | 119 | 2 | 130 | 50 |
| 112 | 119 | 120 | 2 | 130 | 50 |
| 113 | 116 | 119 | 2 | 134 | 25 |
| 118 | 122 | 123 | 2 | 100 | 25 |
| 130 | 131 | 132 | 2 | 100 | 25 |
| 116 | 113 | 114 | 2 | 100 | 25 |
| 113 | 116 | 117 | 2 | 100 | 25 |
| 116 | 119 | 120 | 2 | 100 | 25 |
| 125 | 128 | 129 | 2 | 100 | 25 |
| 113 | 114 | 115 | 2 | 180 | 25 |
| 116 | 117 | 118 | 2 | 180 | 25 |
| 119 | 120 | 121 | 2 | 180 | 25 |
| 122 | 123 | 124 | 2 | 180 | 25 |
| 125 | 126 | 127 | 2 | 180 | 25 |
| 128 | 129 | 130 | 2 | 180 | 25 |
| 115 | 140 | 139 | 2 | 130 | 50 |
| 113 | 147 | 146 | 2 | 130 | 50 |
| 125 | 154 | 153 | 2 | 130 | 50 |
| 127 | 161 | 160 | 2 | 130 | 50 |
| 122 | 168 | 167 | 2 | 130 | 50 |
| 124 | 175 | 174 | 2 | 130 | 50 |
| 131 | 182 | 181 | 2 | 130 | 50 |
| 133 | 189 | 188 | 2 | 130 | 50 |

---



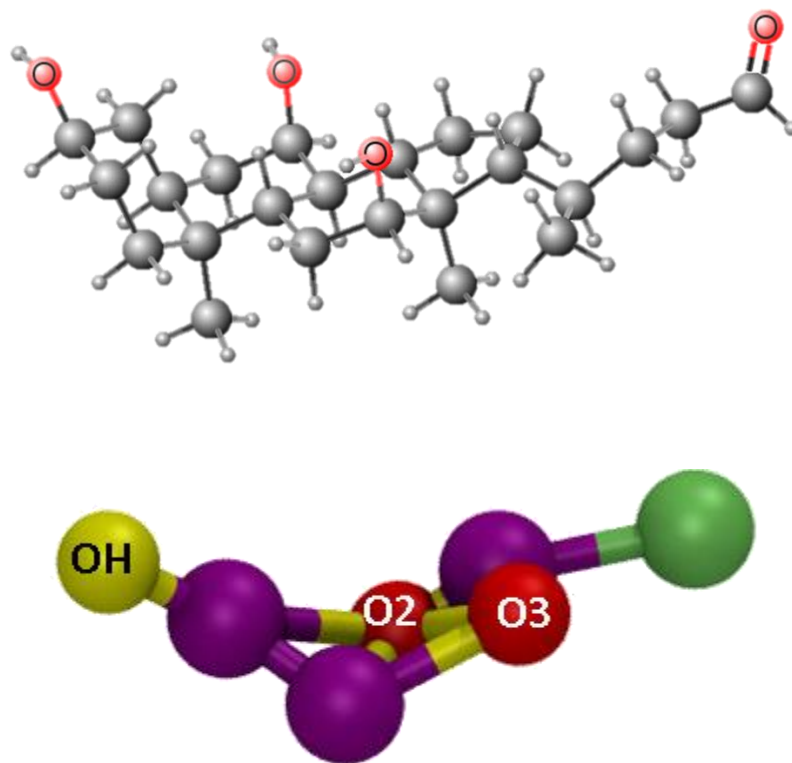

Figure S1. The (a) atomistic and (b) coarse grained structure of cholic acid. The beads labeled as OH (yellow), O2 (red), and O3 (red) in the coarse grained structure provide facial amphiphilicity to cholic acid.

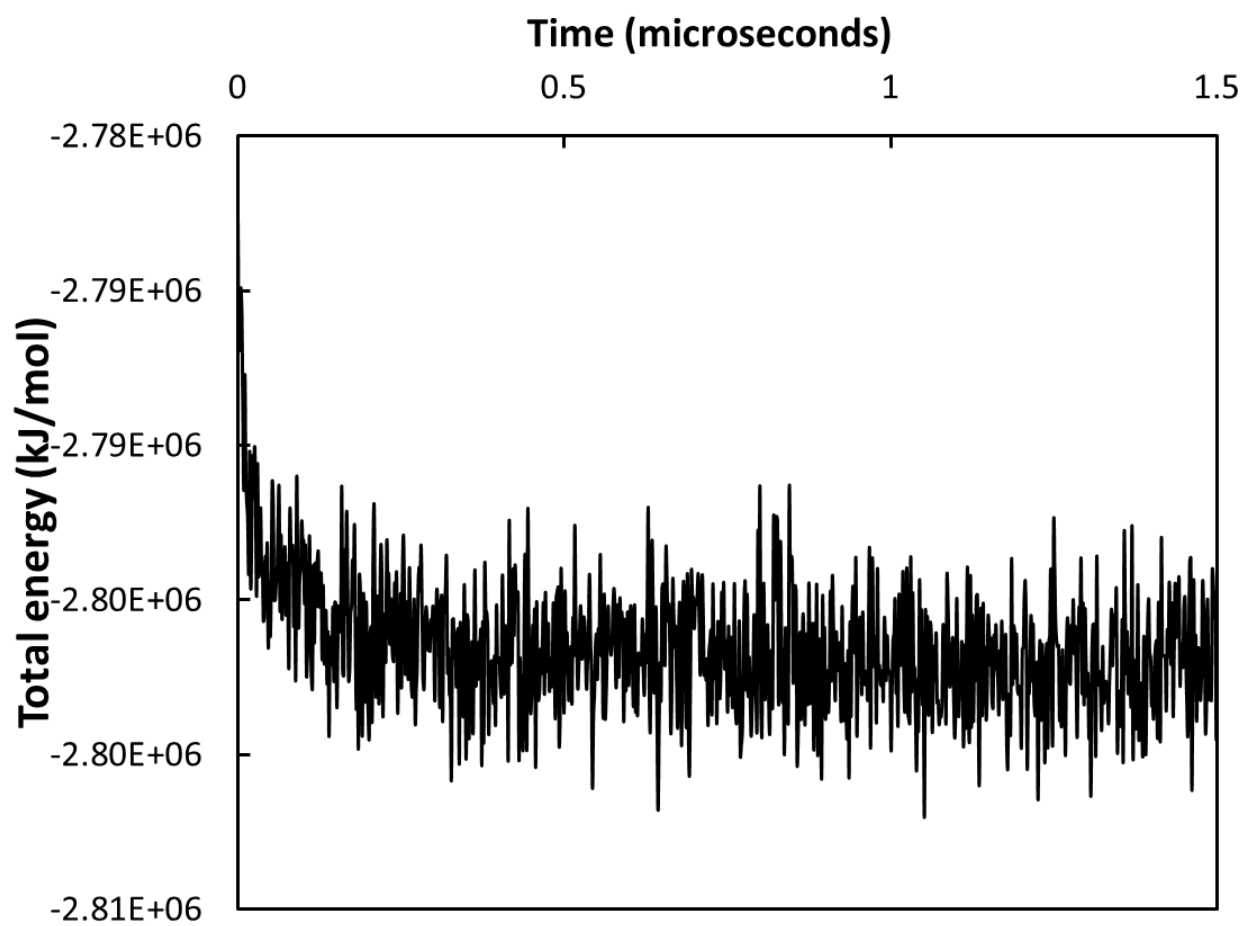

Figure S2. Total energy versus time plot for self-assembly of PTX-PEG<sup>5K</sup>CA<sub>8</sub> 17% (w/w %) system.

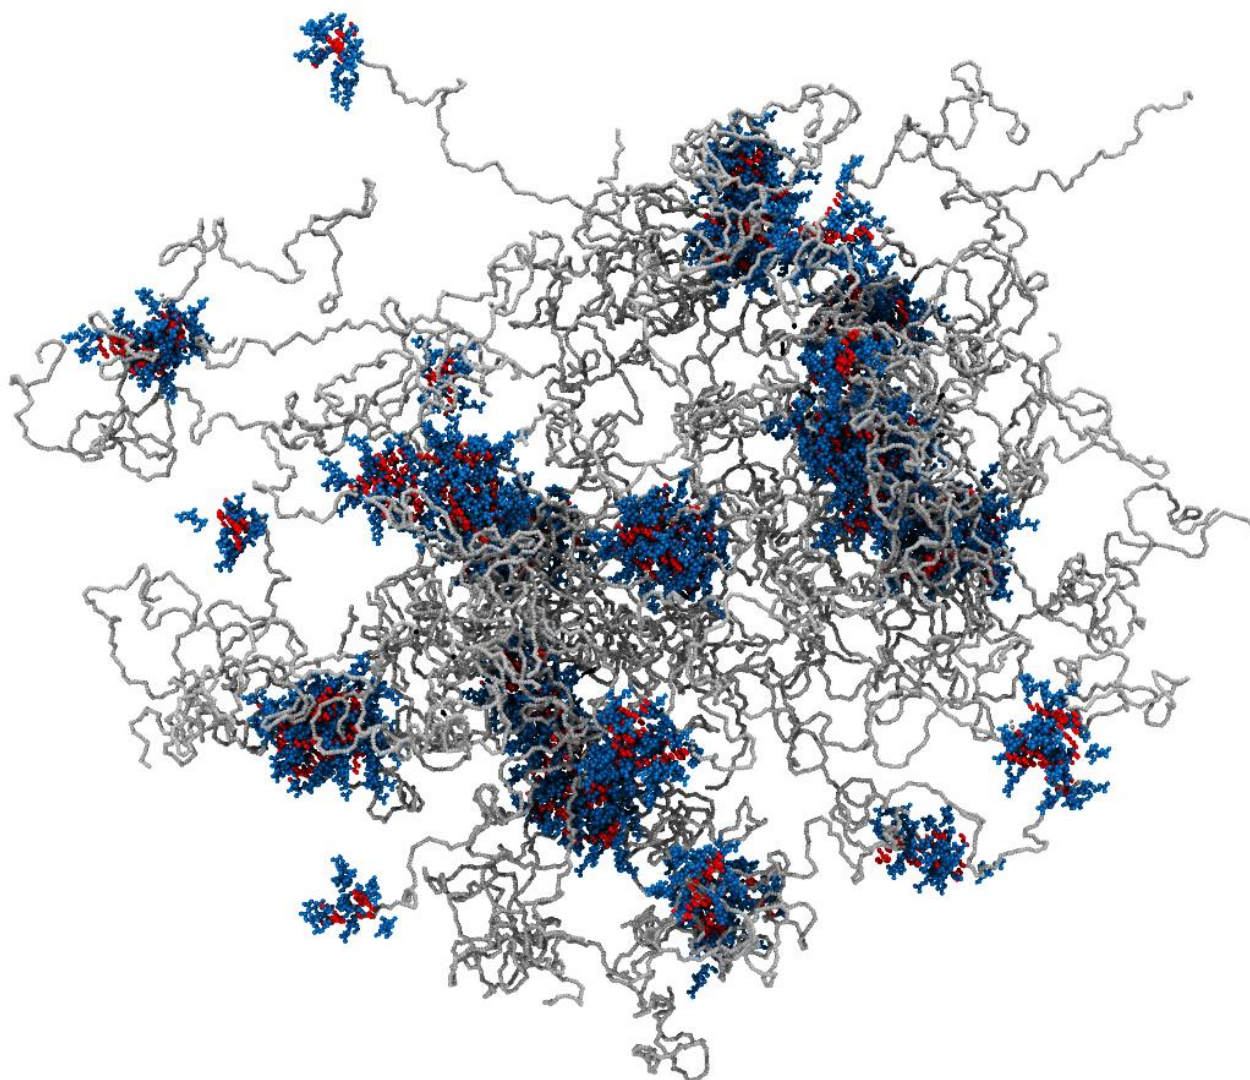

Figure S3. Snapshot of reverse mapped PEG<sup>5K</sup>CA<sub>8</sub> system in a cubic simulation box at 960 ns. Atomistic water molecules are not shown for clarity. Colors: PTX (orange), PEG (gray), Cholic acid (blue) and lysine (red).

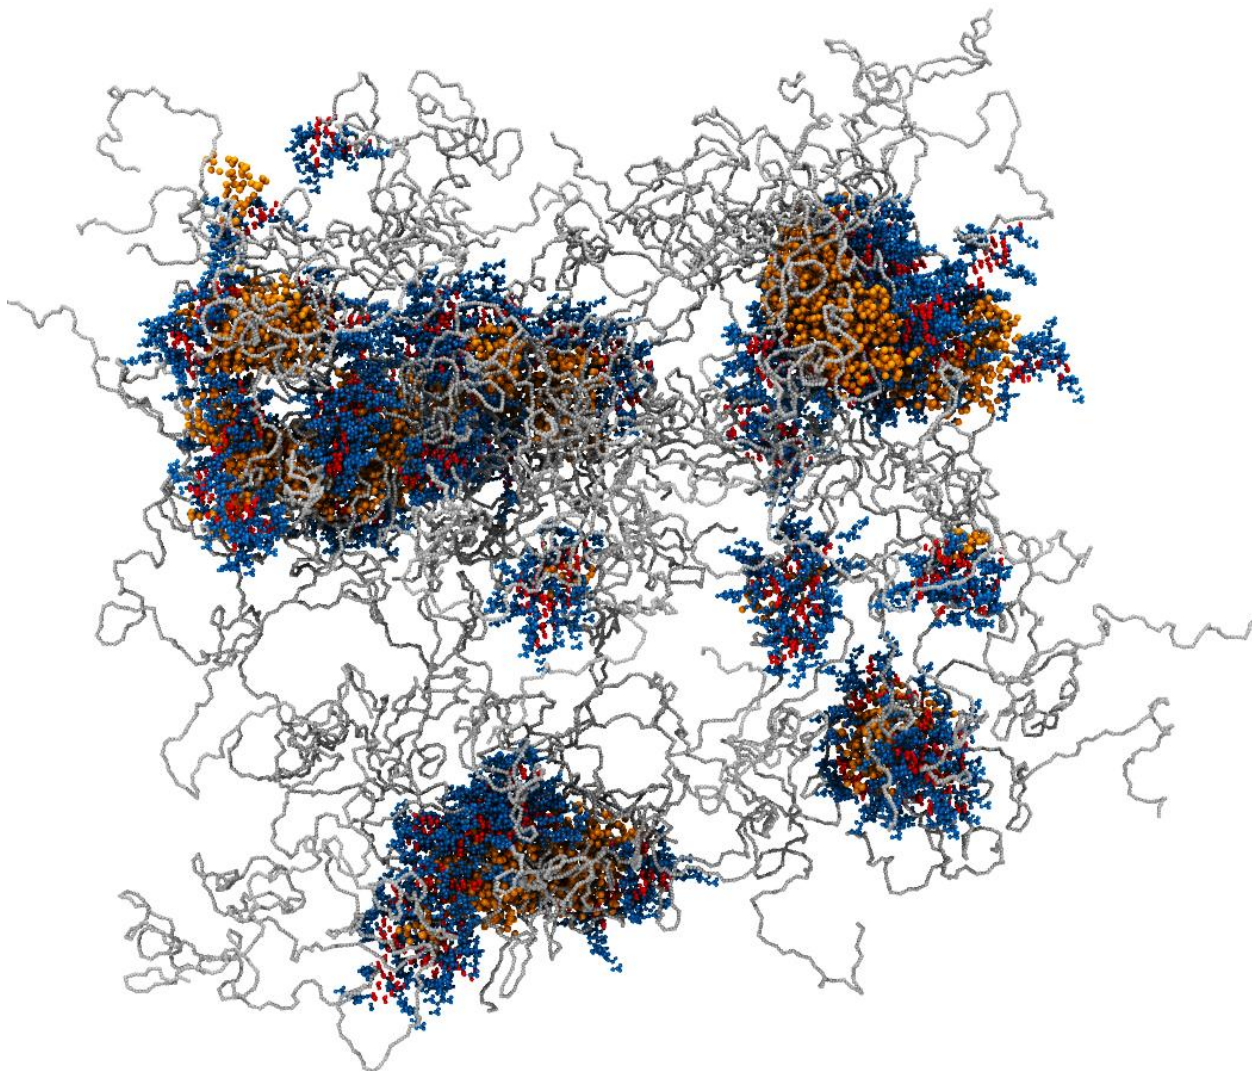

Figure S4. Reverse mapped PTX-PEG<sup>5K</sup>CA<sub>8</sub> system with 17 % (w/w %) drug loading in simulation box at 1.5  $\mu$ s. Atomistic water molecules are not shown for clarity. Colors: PTX (orange), PEG (gray), Cholic acid (blue) and lysine (red).

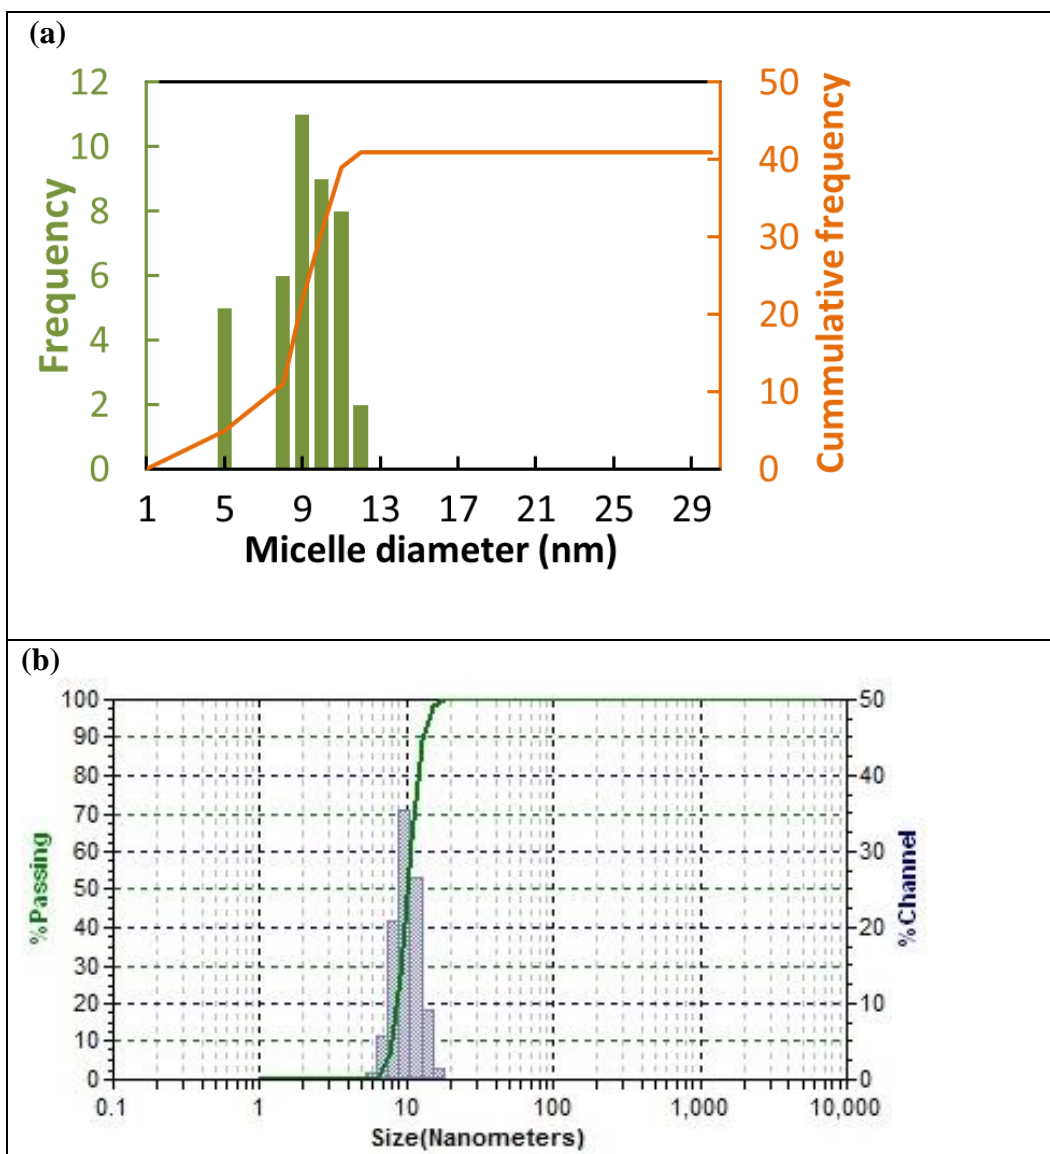

Figure S5. The size distribution of (a) PEG<sup>2K</sup>CA<sub>4</sub> obtained from simulations and (b) experimental data measured by dynamic light scattering

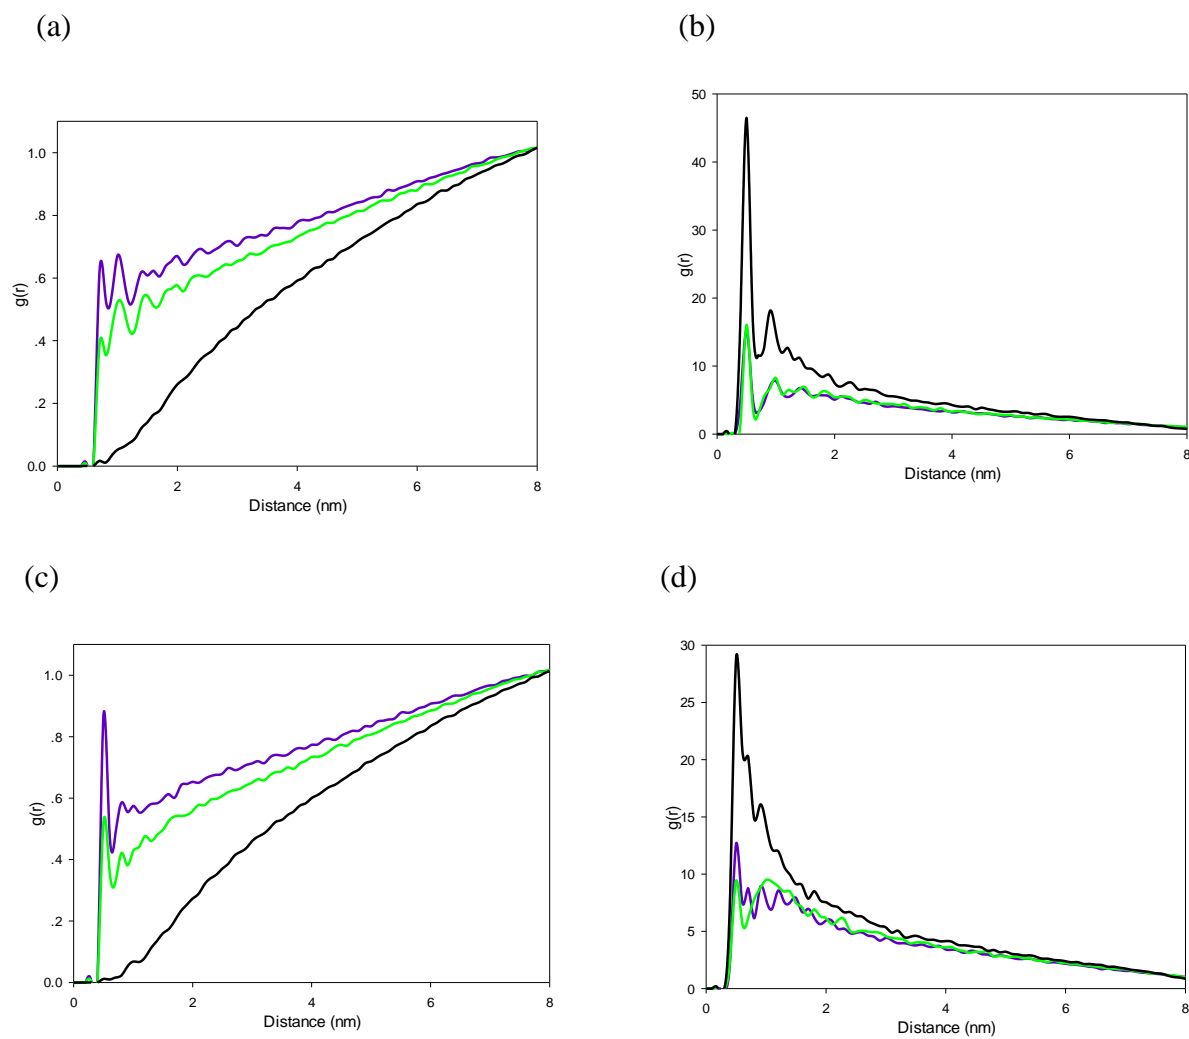

Figure S6. Radial distribution functions of (a) OH-OH (b) O2-water (c) O3-water and (d) O2-O2 cholic acid beads
